# Supplementary material for: The metabolic signature of cardiorespiratory fitness: a protocol for a systematic review and meta-analysis
Source: HighWire-hosted journal article supplement (doi:10.1136/bmjsem-2020-001008), 2021-02-01
Supplement: bmjsem-2020-001008supp002_data_supplement.pdf [file bmjsem-2020-001008supp002_data_supplement.pdf]

| Table S1 Custom modified version of QUADOMICS                                                                                                                                                                                                                                                      |                                                                                                                                                                                                        |
|----------------------------------------------------------------------------------------------------------------------------------------------------------------------------------------------------------------------------------------------------------------------------------------------------|--------------------------------------------------------------------------------------------------------------------------------------------------------------------------------------------------------|
| Items                                                                                                                                                                                                                                                                                              | Description                                                                                                                                                                                            |
| 1                                                                                                                                                                                                                                                                                                  | Were selection criteria clearly described?                                                                                                                                                             |
| 3                                                                                                                                                                                                                                                                                                  | Was the type of sample fully described?                                                                                                                                                                |
| 4                                                                                                                                                                                                                                                                                                  | Were the procedures and timing of biological sample collection with respect to clinical factors described with enough detail?                                                                          |
|                                                                                                                                                                                                                                                                                                    | 4.1. Clinical and physiological factors                                                                                                                                                                |
|                                                                                                                                                                                                                                                                                                    | 4.2. Diagnostic and treatment procedures.                                                                                                                                                              |
| 5                                                                                                                                                                                                                                                                                                  | Were handling and pre-analytical procedures reported in sufficient detail and similar for the whole sample? And, if differences in procedures were reported, was their effect on the results assessed? |
| 10                                                                                                                                                                                                                                                                                                 | Was the execution of the index test described in sufficient detail to permit replication of the test?                                                                                                  |
| 11                                                                                                                                                                                                                                                                                                 | Was the execution of the reference standard described in sufficient detail to permit its replication?                                                                                                  |
| 15                                                                                                                                                                                                                                                                                                 | Were uninterpretable/intermediate test results reported?                                                                                                                                               |
| 16                                                                                                                                                                                                                                                                                                 | Is it likely that the presence of overfitting was avoided?                                                                                                                                             |
| <p>Number in the first column refer to original items of QUADOMICS</p> <p>QUADOMICS: an adaptation of the Quality Assessment of Diagnostic Accuracy Assessment (QUADAS) for the evaluation of the methodological quality of studies on the diagnostic accuracy of omics-based technologies(29)</p> |                                                                                                                                                                                                        |
